# Supplementary material for: Advanced nitrogen removal from the biological secondary effluent of dyeing wastewater via a biological–ferric–carbon nitrification and denitrification process
Source: Royal Society of Chemistry journal article supplement (doi:10.1039/c6ra15130b), 2016-01-01
Supplement: c6ra15130b1.pdf [file c6ra15130b1.pdf]

**Supporting Information**

**Advanced nitrogen removal from biological secondary effluent of  
dyeing wastewater *via* biological-ferric-carbon nitrification and  
denitrification process**

Hong Chen, Gang Xue\*, Mengran Jiang, Yuying Cheng

*(School of Environmental Science and Engineering, Donghua University, 2999 North Renmin  
Road, Songjiang District, Shanghai, 201620, China)*

\*Corresponding author

E-mail: [xuegang@dhu.edu.cn](mailto:xuegang@dhu.edu.cn)

Tel: 86-21-67792538

Fax: 86-21-67792522

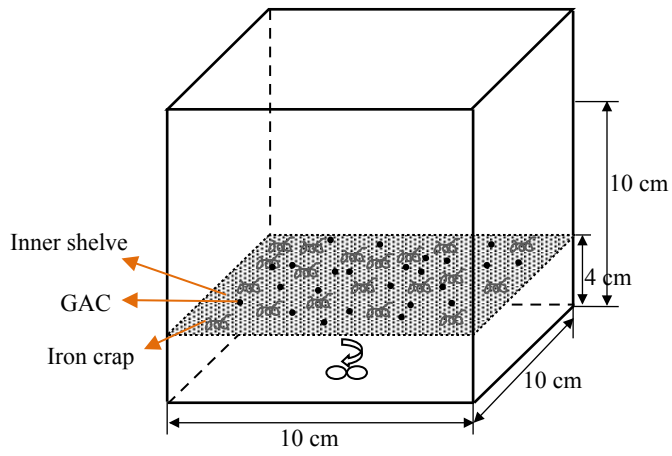

Fig. S1 Sketch map of the reactor used in this study

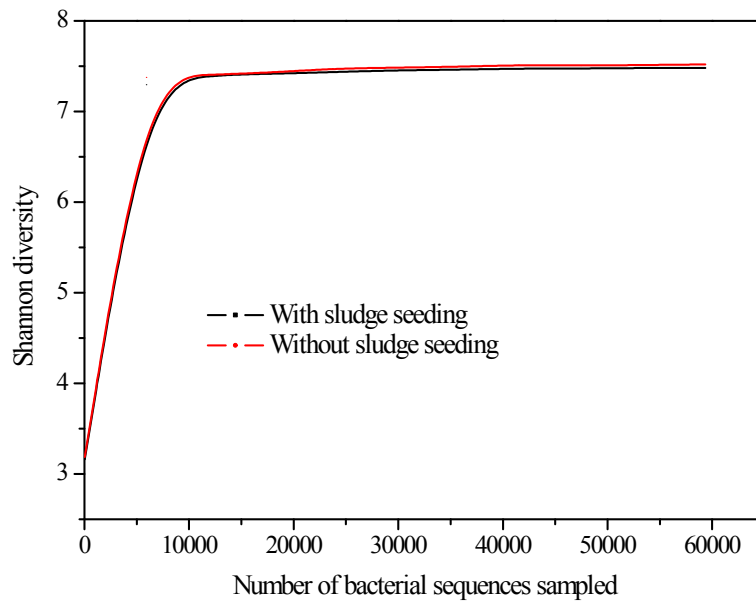

Fig. S2 Bacterial Shannon diversity curves in the biological ferric-carbon systems with sludge seeding (black line) or not (red line). The OTUs were defined by clustering sequences at the dissimilarity levels of 3%.

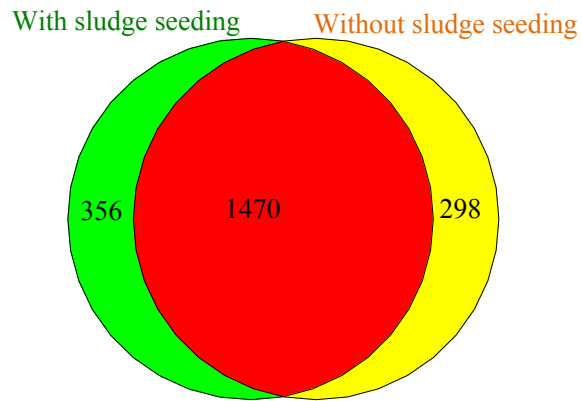

Fig. S3 Venn of two bacterial communities from reactor with sludge seeding and reactor without sludge seeding based on OUT (3% distance).

Table S1 Metal element composition and content of the ferric scrap used in this study

| Element     | Fe  | Mn      | Cr      | Mo      | Al      | Cu      |
|-------------|-----|---------|---------|---------|---------|---------|
| Content (%) | >90 | 0.3-0.6 | 0.7-1.1 | 0.3-0.5 | 0.4-0.8 | 0.8-1.2 |
